# Supplementary material for: Impact of Prior Cesarean Section on Surgical Site Infections, Microbiological patterns, and Surgical Outcomes: A Prospective Multicenter Cohort Study in South Ethiopia
Source: Research Square preprint supplement (doi:10.21203/rs.3.rs-7502284/v1), 2025-09-22
Supplement: Supplementary file 1 [file d64a4c5c7aac20c6b1bea36c.docx]

**Table S1. Baseline demographic, obstetric, preoperative, and intraoperative characteristics of women undergoing first versus repeat cesarean section (n = 1,506).**

| **Characteristic** | **First CS (n=753)** | **Repeat CS (n=753)** | **Total (n=1,506)** | ***p-value*** |
| --- | --- | --- | --- | --- |
| **Demographic Characteristics** |  |  |  |  |
| **Age (years), Mean ± SD** | 26.9 ± 5.0 | 30.1 ± 5.6 | 27.8 ± 5.4 | <0.001 |
| Age category, n (%) |  |  |  | 0.998 |
| <20 | 92 (12.2) | 92 (12.2) | 184 (12.2) |  |
| 20–29 | 447 (59.4) | 446 (59.2) | 893 (59.3) |  |
| > 30 | 214 (28.4) | 214 (28.6) | 428 (28.5) |  |
| **Residence, n (%)** |  |  |  | 1.000 |
| Urban | 355 (47.1) | 355 (47.1) | 710 (47.1) |  |
| Rural | 398 (52.9) | 398 (52.9) | 796 (52.9) | 1.000 |
| **Education, n (%)** |  |  |  | 0.997 |
| No formal education | 177 (23.5) | 177 (23.5) | 354 (23.5) |  |
| Primary | 110 (14.6) | 111 (14.7) | 221 (14.7) |  |
| Secondary | 189 (25.1) | 190 (25.2) | 379 (25.2) |  |
| College or higher | 277 (36.8) | 277 (36.8) | 554 (36.8) |  |
| **BMI (kg/m²), Mean ± SD** | 24.8 ± 3.7 | 25.9 ± 4.3 | 25.1 ± 3.9 | <0.001 |
| Obese (BMI ≥30), n (%) | 37 (4.9) | 37 (4.9) | 74 (4.9) | 1.000 |
| **Obstetric & Preoperative Characteristics** | | | | |
| Referred, n (%) | 260 (34.5) | 319 (42.4) | 579 (38.4) | 0.002 |
| Parity status, n (%) |  |  |  |  |
| Primiparous | 509 (67.6) | 0 (0.0) | 509 (33.8) | <0.001 |
| Multiparous (2–4) | 200 (26.6) | 604 (80.21) | 804 (53.4) | <0.001 |
| Grand multiparous (≥5) | 44 (5.8) | 147 (19.5) | 191 (12.7) | <0.001 |
| **ANC visits, n (%)** |  |  |  |  |
| ≥1 ANC visit | 705 (93.6) | 730 (97.0) | 1,435 (95.3) | 0.001 |
| ≥4 ANC visits | 566 (75.2) | 443 (58.8) | 1,009 (67.0) | <0.001 |
| In labor at CS, n (%) | 600 (79.7) | 550 (73.0) | 1,150 (76.4) | 0.003 |
| Prolonged labor (>24h), n (%) | 45 (6.0) | 70 (9.3) | 115 (7.6) | 0.040 |
| Membrane ruptures before CS, n (%) | 350 (46.5) | 490 (65.1) | 840 (55.8) | <0.001 |
| Vaginal exams before CS, n (%) | 520 (69.1) | 650 (86.4) | 1,170 (77.7) | <0.001 |
| Previous hospitalization, n (%) | 90 (12.0) | 162 (21.5) | 252 (16.7) | <0.001 |
| Existing medical conditions, n (%) | 240 (31.9) | 271 (36.0) | 511 (33.9) | 0.110 |
| Hypertension/pre-eclampsia | 40 (5.3) | 57 (7.6) | 97 (6.4) | 0.080 |
| Anemia | 140 (18.6) | 140 (18.6) | 280 (18.6) | 1.000 |
| HIV+ | 30 (4.0) | 35 (4.6) | 65 (4.3) | 0.600 |
| Diabetes mellitus | 15 (2.0) | 26 (3.5) | 41 (2.7) | 0.070 |
| HBV | 18 (2.4) | 26 (3.5) | 44 (2.9) | 0.210 |
| Malaria/other AFI | 64 (35.1) | 62 (8.2) | 126(8.3) | >0.05 |
| **Intraoperative Characteristics** |  |  |  |  |
| **Urgency of procedure, n (%)** |  |  |  | <0.001 |
| Emergency CS | 668 (88.7) | 490 (65.1) | 1,158 (76.9) |  |
| Elective CS | 85 (11.3) | 264 (34.9) | 348 (23.1) |  |
| **Type of anesthesia, n (%)** |  |  |  | 0.03 |
| Spinal/Epidural | 633 (84.1) | 598 (79.4) | 1,231 (81.7) |  |
| General anesthesia | 120 (15.9) | 155 (20.6) | 275 (18.3) |  |
| **Preoperative skin preparation, n (%)** | | | | <0.001 |
| Aqueous povidone-iodine | 85 (11.3) | 94 (12.5) | 179 (11.9) | 0.460 |
| Alcohol + iodine | 319 (42.4) | 437 (58.0) | 756 (50.2) | <0.001 |
| Chlorhexidine + alcohol | 349 (46.3) | 222 (29.5) | 571 (37.9) | <0.001 |
| Surgical antibiotic prophylaxis, n (%) | 730 (97.0) | 731 (97.1) | 1,461 (97.0) | 0.900 |
